1 **16S rRNA gene sequencing reveals site-specific signatures of the upper and lower**  
2 **airways of cystic fibrosis patients.**

3 Sarah K. Lucas<sup>1</sup>, Robert Yang<sup>2</sup>, Jordan M. Dunitz<sup>3</sup>, Holly C. Boyer<sup>2</sup>, Ryan C. Hunter<sup>1#</sup>

4 <sup>1</sup> Department of Microbiology & Immunology, University of Minnesota

5 <sup>2</sup> Department of Otolaryngology, Head and Neck Surgery, University of Minnesota

6 <sup>3</sup> Division of Pulmonary, Allergy, Critical Care & Sleep Medicine, University of Minnesota

7

8 # Corresponding Author: Ryan C. Hunter

9 Department of Microbiology & Immunology

10 University of Minnesota

11 690 23<sup>rd</sup> Ave. SE

12 Minneapolis, MN 55455

13

14 Author Contributions: SKL, RY, JMD, HCB, and RCH conceived and designed the study,  
15 performed experiments, collected and analyzed data, wrote and reviewed the manuscript. RY  
16 and HCB consented subjects and acquired patient samples.

17

18 Funding: This work was supported by a Pathway to Independence Award from the National  
19 Heart Lung and Blood Institute to RCH (R00HL114862), and funding through a grant from Lions  
20 5M International. SKL was supported by a National Institutes of Health T32 Fellowship (#T90  
21 DE 0227232) awarded through the National Institute of Dental and Craniofacial Research.

22

23 Running Title: Microbiome of the upper and lower airways

24 **ABSTRACT**

25 **Rationale:** Chronic rhinosinusitis (CRS) is an inflammatory disorder of the sinonasal mucosa  
26 associated with microbial colonization. Metastasis of sinus microbiota into the lower airways is  
27 thought have significant implications in the development of chronic respiratory disease.  
28 However, this dynamic has not been thoroughly investigated in cystic fibrosis (CF) patients,  
29 where lower airway infections are the primary driver of patient mortality. Given the high  
30 prevalence of CRS in CF patients and the proposed infection dynamic between the upper and  
31 lower airways, a better understanding of sinus-lung continuum is warranted.

32 **Objective:** To compare the microbiome of matched sinus mucus and lung sputum samples from  
33 CF subjects undergoing functional endoscopic sinus surgery (FESS) for treatment of CRS.

34 **Methods:** Mucus was isolated from the sinuses and lungs of twelve CF patients undergoing  
35 FESS. 16S ribosomal RNA gene sequencing was then performed to compare bacterial  
36 communities of the CF lung and sinus niches. Finally, functional profiling was performed to  
37 predict bacterial metagenomes from the 16S dataset, and was used to compare pathogenic  
38 bacterial phenotypes between the upper and lower airways.

39 **Measurements and Main Results:** Bacterial richness was comparable between airway sites,  
40 though sinus and lung environments differed in community evenness, with the sinuses  
41 harboring a higher prevalence of dominant microorganisms. Beta diversity metrics also revealed  
42 that samples clustered more consistently by airway niche rather than by individual. Finally,  
43 predicted metagenomes showed that anaerobic metabolism was enriched in the lung  
44 environment, while genes associated with both biofilm formation and Gram identity were not  
45 variable between sites.

46 **Conclusions:** Sinus and lung microbiomes are distinct with respect to richness and evenness,  
47 while sinus communities have a higher incidence of a dominant taxon. Additionally, ordination  
48 analyses point to sinus and lung environments as being stronger determinants of microbial

49 community structure than the individual patient. Finally, BugBase-predicted metagenomes  
50 revealed anaerobic phenotypes to be in higher abundance in the lung relative to the sinuses.  
51 Our findings indicate that while the paranasal sinuses and lungs may still comprise a unified  
52 airway in which lower airways are seeded by sinus microbiota, these discrete airway  
53 microenvironments harbor distinct bacterial communities.

54

## 55 INTRODUCTION

56 Cystic fibrosis is an autosomal recessive disease caused by a genetic defect in the  
57 cystic fibrosis transmembrane regulator (CFTR) protein (1). Mutations in CFTR result in an  
58 impairment of chloride and bicarbonate transport across epithelial cell membranes, leading to  
59 impaired mucociliary clearance, a pro-inflammatory milieu, and susceptibility to bacterial  
60 infection (2). This is particularly evident in the lower airways, where chronic infections and the  
61 ensuing inflammatory response are the primary cause of CF patient mortality (3). Though  
62 *Pseudomonas aeruginosa* is the canonical pathogen of CF lung disease (4), culture-  
63 independent studies have identified remarkably complex microbiota (including fungi and viruses)  
64 that are also thought to contribute to pulmonary decline (5–9). A better understanding of  
65 respiratory microbial community dynamics and their interactions with the host will undoubtedly  
66 generate new therapeutic strategies.

67 In addition to the lung, CFTR defects manifest at other anatomical sites, including the  
68 biliary tree, small intestine, and the paranasal sinuses. In the latter instance, defective CFTR ion  
69 transport leads to an increase in mucus viscosity, decreased mucociliary clearance, and  
70 obstruction of the sinus ostia (10). Secondary events such as development of hypoxia and  
71 impairment of host defenses renders this niche susceptible to bacterial colonization and chronic  
72 rhinosinusitis (CRS) – a multi-symptomatic, prolonged inflammatory syndrome (11). Notably,  
73 there is a striking incidence of CRS in the CF population relative to non-CF subjects (~16%,  
74 (12)). This is particularly evident in patients with classical CF mutations (class I-III), who, based  
75 on radiological evidence, have a CRS incidence rate of nearly 100% (13–15).

76 Culture-based studies have revealed that CF-associated CRS (CF-CRS) patients harbor  
77 microbiota that differ from non-CF sinus infections, including *Staphylococcus aureus* and  
78 *Haemophilus influenzae* in pediatric patients, followed by *P. aeruginosa* and other opportunistic  
79 pathogens as patients age (16). This dynamic generally follows the same temporal succession  
80 of the microbiota of the CF lung (17, 18) and several groups have demonstrated a positive

81 correlation between the bacteriology of the upper and lower airways in CF subjects (19–21).  
82 These observations have led to suggestions that upper airway infections may spread to the  
83 lower airways (20, 21). In fact, compelling evidence has implicated the sinuses as infection foci  
84 for lung pathogens, where they first adapt to the host before descending into the lungs (22–25).  
85 Genotypic analyses of paired *P. aeruginosa* isolates between sites also suggest a direct  
86 exchange; *P. aeruginosa* cultured simultaneously from the sinuses and lungs were shown to be  
87 genetically identical in 38 of 40 subjects (95%) (26). A significant association between  
88 genotypes of isolates cultured from sinus mucus and bronchoalveolar lavage fluid has also been  
89 shown (27). These data are reinforced by studies of CF lung transplant patients, where recipient  
90 allografts were found to be re-colonized with the same *P. aeruginosa* clones as those cultured  
91 prior to transplantation (28, 29). Taken together, these observations strongly support the notion  
92 of a sinus pathogen reservoir and a single unified airway, in which the treatment of upper airway  
93 infections could have profound benefits for CF lung disease management.

94 While *P. aeruginosa* and *S. aureus* represent two of the most common organisms  
95 isolated from the sinuses in CF subjects (30, 31), culture-independent studies suggest that the  
96 CF sinuses are also colonized by an abundance of anaerobes (e.g. *Propionibacterium acnes*)  
97 and other non-canonical pathogens that are infrequently detected by clinical culture (30). These  
98 data are consistent with microbiome surveys of CF lung disease, which is now widely  
99 recognized to have a polymicrobial etiology (5–9). Recent sequencing studies have evaluated  
100 relationships between the microbiota of the oral, nasal and lung cavities in CF patients (32), but  
101 to our knowledge, molecular methods have not been used to assess the microbial dynamic  
102 between the CF sinuses and lungs at a community level. From a clinical perspective, these data  
103 are critical for effective therapy; at present, obtaining sinus cultures is invasive and time-  
104 consuming, making culture-guided antibiotics difficult to implement. Rather, lower airway  
105 sputum cultures are frequently used as a proxy of upper airway disease (33). Since it is  
106 generally (and perhaps incorrectly) assumed that any bacterium found in the upper airways is

107 present in the lungs (33), antibiotics are empirically prescribed for sinus infections based on  
108 sputum culture. Patient response to this CF-CRS treatment approach is largely ineffective, and  
109 patients who fail medical management ultimately require surgical intervention (10, 34, 35).  
110 Therefore, a deeper understanding of the ecological relationships between the sinuses and  
111 lungs is needed to improve upon treatment strategies.

112 In this cross-sectional study, we used 16S rRNA gene sequencing to directly compare  
113 the bacterial community composition of the upper (sinus) and lower (lung) airways in a small  
114 cohort of CF patients undergoing functional endoscopic sinus surgery for the treatment of CRS.  
115 The primary objective was to compare the diversity of bacterial communities of the sinuses and  
116 lungs found by this culture independent approach. As a secondary objective, we performed  
117 predictive metagenomic profiling to assess whether differences in predicted bacterial  
118 phenotypes are reflective of the niche space in which they are found. We discuss these findings  
119 in the context of using lower airway sputum cultures to steer targeted therapies for upper airway  
120 infection.

## 121 **METHODS**

122 **Patient cohort and specimen collection.** Twelve participants with CF undergoing  
123 functional endoscopic sinus surgery (FESS) were recruited at the University of Minnesota  
124 Department of Otolaryngology, Head and Neck Surgery, and informed consent was obtained for  
125 all subjects. Prior to FESS, patients provided an expectorated lung sputum sample directly into  
126 a Sputocol sputum collection conical tube. Sinus samples were obtained from the middle  
127 meatal region under endoscopic visualization by suctioning secretions into a mucus specimen  
128 trap (Cardinal Health, Dublin, OH).

129 **Quantitative PCR.** Bacterial burden was estimated by quantifying 16S copy number  
130 from DNA extracted from clinical specimens using qPCR. Universal 16S rRNA qPCR primers  
131 338F and 518R were used (36, 37). QuantiTect SYBR Green (Qiagen, Valencia, CA) was used  
132 according to manufacturer's instructions. Reactions were prepared in triplicate as described

133 previously, with adjustments to the amplification protocol (38). Additional details can be found in  
134 the data supplement.

135 **DNA extraction, Library Preparation, and Sequencing.** The Powersoil DNA Isolation  
136 Kit (MoBio, Carlsbad, CA) was used to extract genomic DNA from 300  $\mu$ L of mucus, following  
137 the manufacturer's protocol. Purified DNA was submitted to the UMN Genomics Center (UMGC)  
138 for 16S library preparation using a two-step PCR protocol (39). The V4 region of the 16S gene  
139 was amplified and sequenced on an Illumina MiSeq using TruSeq version 3 2x300 paired-end  
140 technology. Water and reagent control samples were also submitted for sequencing and did not  
141 pass quality control steps due to 16S rRNA gene content below detection thresholds.

142 **Sequence analysis.** Raw 16S rRNA gene sequence data were deposited as fastq files  
143 in the NCBI Sequence Read Archive under accession number PRJNA374847. Sequence data  
144 were obtained from UMGc and analyzed using a pipeline developed by the UMN Informatics  
145 Institute in collaboration with the UMGc and the Research Informatics Solutions (RIS) group at  
146 the UMN Supercomputing Institute (40). Details are provided in the data supplement.

147 **Prediction of sinus and lung metagenomes based on 16S rRNA data.** Metagenomes  
148 were inferred from 16S rRNA data using Phylogenetic Investigation of Communities by  
149 Reconstruction of Unobserved States (PICRUSt) (v. 1.0.0) (41). PICRUSt uses marker gene  
150 survey data to predict metagenome functional content of microorganisms through ancestral  
151 state reconstruction. We implemented PICRUSt scripts to infer metagenomes from the quality  
152 filtered OTU table. Briefly, OTUs were normalized by 16S copy number using the script  
153 `normalize_copy_number.py`. Normalized OTUs were used to predict KEGG orthology (KO)-  
154 based metagenomes of our samples through input into the script `predict_metagenomes.py` with  
155 an additional per-sample Nearest Sequenced Taxon Index (NTSI) calculation. Finally, predicted  
156 metagenomes were further categorized by KEGG pathways using the

157 categorize\_by\_function.py script. Output of this script was filtered to only include those  
158 pathways that accounted for  $\geq 1\%$  of count data in each sample.

159 We then used BugBase (<https://bugbase.cs.umn.edu>) to summarize predicted  
160 metagenomes by bacterial phenotype. BugBase combines functionalities of PICRUSt,  
161 Integrated Microbial Genome comparative analysis system (IMG4) (42), the PATRIC bacterial  
162 bioinformatics database (43), and the KEGG database (44), to identify specific OTUs that  
163 contribute to a community-wide phenotype. The main script was run with default settings using  
164 the same filtered OTU table as used in PICRUSt.

165 **Statistical Analyses.** All statistical analyses were carried out in GraphPad Prism 6.0  
166 unless stated otherwise. Significance was assessed at the  $\alpha = 0.05$  level. A non-parametric  
167 paired t-test (Wilcoxon matched-pairs signed rank test) was used to assess significance when  
168 comparing metrics between sinus and lung samples. For alpha diversity metrics, a  
169 nonparametric t-test was used with 999 Monte Carlo permutations, implemented through the  
170 compare\_alpha\_diversity.py script in QIIME (45). Within-patient and between-sample type  
171 taxonomy correlations were calculated using the QIIME script compare\_taxa\_summaries.py  
172 using Spearman correlation with 999 permutations. Permutational analysis of variance and  
173 homogeneity of dispersion tests were carried out using the 'adonis', 'betadisper', and  
174 'permutest' functions in the 'vegan' R package (v. 2.4.1) (46).

175 **Ethics Statement.** Studies were approved by the Institutional Review Board at UMN  
176 (IRB no.1403M49021). Subjects provided informed written consent prior to sample collection.

177

## 178 RESULTS

179 **Patient Cohort.** The primary goal of this study was to examine variability in bacterial  
180 communities between the upper and lower airways. Twelve CF adults with CRS who were  
181 scheduled to undergo functional endoscopic sinus surgery (FESS) were recruited for the study.



182 Prior to surgery, each patient provided an expectorated sputum sample, and sinus mucus was  
183 collected at the beginning of FESS. These samples are herein referred to as “sinus” and “lung”  
184 samples, denoting their anatomical origin. Clinical data were also collected that included CF  
185 genotype, microbiology cultures from sinus specimens, spirometry and Sino-Nasal Outcome  
186 Test (SNOT-22) scores, and prior FESS procedures (Table 1). CF genotype was available for  
187 11 of the 12 patients, with 6 patients being homozygous for  $\Delta F508$ , 3 heterozygous  $\Delta F508$ , and  
188 2 heterozygous non- $\Delta F508$  mutations. Clinical culture data was also available for 11 of 12 sinus  
189 samples. Of these, 7 were positive for *Pseudomonas aeruginosa*, and 5 were positive for  
190 *Staphylococcus aureus*. The average SNOT-22 score across our patient cohort was  $35 \pm 17$ ,  
191 consistent with previous reports of CF patients undergoing FESS (47).

192 **Bacterial load in CF sinus and lung samples.** Quantitative polymerase chain reaction  
193 (qPCR) analysis of 16S ribosomal RNA (rRNA) gene copy number was performed to estimate  
194 bacterial load (Fig. 1). On average, sinus specimens contained  $2.72 \times 10^4$  (IQR =  $2.69 \times 10^3 -$   
195  $1.72 \times 10^5$ ) 16S gene copies per 10 ng genomic DNA, while lung sputum harbored  $5.33 \times 10^5$   
196 (IQR= $6.1 \times 10^3 - 5.02 \times 10^5$ ) per 10 ng of genomic DNA. These data suggest a modest but  
197 significant difference in 16S gene abundance between sample types (Fig. 1A,  $P=0.0425$ ).  
198 Interestingly, patient age was positively associated with 16S gene abundance in sinus samples,  
199 but this relationship was not observed for the lower airways (Fig. 1B). We also assessed the  
200 relationship between bacterial load and two clinical metrics: FEV1%, the gold standard  
201 spirometry metric used to assess obstructive lung diseases (48), and the SNOT-22 survey used  
202 to assess an array of sinus disease symptoms (47). SNOT-22 scores did not significantly  
203 correlate with 16S copy number in either sinus or lung samples, nor did FEV1% (Fig. 1B).  
204 These results are consistent with previous studies where no association was found between  
205 bacterial load and lung function or quality-of-life (49). Taken together, these data suggest that  
206 the specific composition of each bacterial community rather than its overall abundance  
207 contributes to disease states in both sinus and lung niches.

208 **Bacterial community membership varies with respiratory tract location.** Bacterial  
209 community composition of paired sinus and lung samples was profiled using 16S rRNA gene  
210 sequencing. After filtering sequences for quality and subsampling to an even depth, 51 genera  
211 were identified across all samples (Fig. 2).

212 To investigate genera that accounted for the majority of sequences, we adopted the  
213 definition of a dominant genus (the most abundant genus with at least twice the abundance of  
214 the second most abundant genus) from Coburn et al. (9). A dominant genus was present in  
215 100% of sinus samples but only 33% of lung samples. *Pseudomonas* and *Staphylococcus* were  
216 the dominant genus in five sinus samples each (42%), while *Streptococcus* and *Burkholderia*  
217 were each dominant in a single sinus sample (Fig. 2). As expected, only *Pseudomonas* and  
218 *Staphylococcus* were dominant organisms in the lower airways. The median relative abundance  
219 of the most abundant genus was 0.88 (IQR = 0.75 - 0.99) in each sinus sample, and 0.42 (IQR  
220 = 0.34 - 0.78) for lung samples. The most abundant sinus OTUs were *Pseudomonas*,  
221 *Staphylococcus*, and *Streptococcus*. By contrast, lung samples harbored an abundance of  
222 *Pseudomonas*, *Veillonella*, and *Prevotella*, consistent with previous studies (5–9). Interestingly,  
223 although many taxa were shared between sample pairs, the absence of a known CF pathogen  
224 (e.g. *Pseudomonas*, *Achromobacter*, *Staphylococcus*) in lung sputum was not predictive of its  
225 absence in the paired sinus sample, suggesting that infections at either site could be  
226 perpetuated by different pathogens within a given individual.

227 Based on this observation, in addition to prior studies supporting the notion of bacterial  
228 metastasis between the upper and lower airways, we were interested in the extent to which  
229 genera were shared between sites in each individual subject. Spearman correlations between  
230 genera in matched pairs revealed that within-patient similarities allowed for significant positive  
231 correlation between sites in ten of twelve sample pairs (average Spearman  $\rho$  = 0.45) (Table  
232 E1). A group-wise comparison of sinus and sputum samples showed a weaker correlation  
233 (Spearman  $\rho$  = 0.32,  $P$  = 0.001). This result highlights the potential for bacterial communities of

234 the upper and lower airways to be similar within a given patient, yet the group correlation  
235 underlines the general dissimilarity in bacterial communities between the sinus and lung  
236 microenvironments.

237 **Bacterial diversity varies between the upper and lower airways.** As described above,  
238 a small subset of taxa dominated most of the sequences detected in each sample. To  
239 investigate this further, two alpha diversity metrics, Observed OTUs and Shannon diversity  
240 index, were used as measures of community richness (biodiversity) and evenness (equitability)  
241 (50, 51). Observed OTUs in lung sputum were greater than in sinus samples, indicating greater  
242 taxonomic richness, though the difference was not significant (Fig. 3A). Using the Shannon  
243 diversity index, it was determined that the sinus niche was characterized by increased  
244 unevenness as compared to the sputum samples, consistent with the high prevalence of  
245 dominant genera in the sinus communities surveyed (Fig. 3B). When genera were ordered by  
246 rank, an average of 10 and 20 genera accounted for 99% of the sequences in sinus and lung  
247 samples, respectively (Fig. 3C). These data indicate that the lung environment harbors a  
248 bacterial community that is greater in both richness and evenness when compared to the  
249 sinuses in CF subjects.

250 Spearman correlations were then calculated to assess the relationships between  
251 bacterial load, alpha diversity metrics and patient clinical data (Fig. 3D). These data revealed a  
252 significant inverse correlation between Shannon diversity in the sinus and lung ( $\rho=-0.664$ ,  $P =$   
253  $0.022$ ). Because the data show a similar richness between sites, and both sinus and lung  
254 Shannon diversity revealed positive relationships with observed OTUs (sinus  $\rho=0.881$ ,  $P =$   
255  $3.35 \times 10^{-4}$ ; lung,  $\rho=0.774$ ,  $P = 0.007$ ), it can be inferred that the difference in diversity is driven  
256 by evenness in these niches. Lung Shannon diversity is also positively correlated with lung 16S  
257 rRNA gene copy number ( $\rho=0.678$ ,  $P = 0.019$ ). These data also reiterate the positive correlation  
258 between sinus 16S rRNA gene copy number and patient age ( $\rho=0.624$ ,  $P = 0.033$ ) as shown in  
259 Fig. 1B. Altogether, these data demonstrate that bacterial diversity differs between the sinus

260 and lung niches in CF patients. A decrease in diversity at either site is associated with the  
261 decrease in even distribution of bacterial taxa and is associated with patient age.

262 **Ordination reveals respiratory tract location as a strong descriptor of**  
263 **phylogenetic variance.** To explore multivariate relationships between samples, ordination was  
264 used to visualize the beta diversity of airway microbiota. Of interest was whether bacterial  
265 communities would cluster more closely by (a) patient or (b) sampling site. Previous studies  
266 characterizing the microbiomes of the upper and lower respiratory tract (albeit not in matched  
267 pairs) show many shared taxa between sites, but also inter-individual variation (32, 52). In  
268 addition, evidence suggests that bacterial metastasis between the upper and lower airways in  
269 CF subjects is commonplace (23, 28, 29). Based on these previous studies and our alpha  
270 diversity analyses (Fig. 2), we hypothesized that sample pairs would cluster more closely by  
271 patient, and vary with sample type (between patients).

272 To address this hypothesis, we compared samples utilizing the weighted Unifrac  
273 distance, an abundance-sensitive, phylogenetically relevant beta diversity metric (53). This  
274 metric was calculated to determine phylogenetic pairwise distances between each sample, then  
275 plotted using principal coordinates analysis (PCoA). Contrary to our hypothesis, variation within  
276 patient sinus and lung pairs was such that they did not cluster together nearly as strongly as  
277 they did by sample type (Fig. 4A). Permutational analysis of variance yielded a strong  
278 association with samples clustering by sample type, rejecting the null hypothesis the groupings  
279 had the same centroid ( $P=0.019$ ). A homogeneity of dispersion test lent further confidence to  
280 this conclusion, as we could not reject the null hypothesis that the two groups of samples (sinus  
281 and lung) had the same dispersion ( $P=0.107$ ). Lung samples demonstrated considerable  
282 phylogenetic variation when compared to sinus samples (Fig. 4A). When relative abundances  
283 from our dominant taxa (*Pseudomonas* and *Staphylococcus*) were overlaid, a strong association  
284 was revealed with much of the spatial orientation of samples in the PCoA (Fig. 4B). This  
285 analysis demonstrates that other factors, most notably the sampling site and dominant genera,

286 contribute to the overall community structure. These analyses also suggest that the upper and  
287 lower airways select for unique bacterial community structures, despite sharing individual  
288 genera.

289 **Predicted metagenomes show conservation of most phenotypes between**  
290 **respiratory tract location.** To gain insight into the functional capacity of airway bacterial  
291 communities, an open-source bioinformatics tool, Phylogenetic Investigation of Communities by  
292 Reconstruction of Unobserved States (PICRUSt) (41), was implemented to infer the  
293 metagenomic content of sinus and lung microbiota based on OTUs identified through 16S rRNA  
294 sequence analysis. Sequences derived from all 24 samples had a low Nearest Sequenced  
295 Taxon Index (NSTI) average of 0.017, indicating a high relatedness between bacteria found in  
296 the samples to sequenced genomes, and suggesting a high prediction accuracy for the overall  
297 dataset. Twenty unique KEGG pathways were represented in the inferred metagenomes, and  
298 showed striking similarity between sinus and lung samples (Fig. E1). This suggests that the  
299 functional capacity of the airway bacterial communities are relatively similar, despite the  
300 taxonomic diversity between sample types (Fig. 4).

301 To further summarize the PICRUSt output, we utilized BugBase, a bioinformatics tool  
302 that infers community-wide phenotypes from PICRUSt-predicted metagenomes, and calculates  
303 phenotypic differences between sample groups. BugBase identified that gene functions  
304 associated with an anaerobic phenotype were enriched in lung relative to sinus samples ( $P =$   
305 0.01), and could be attributed to three genera: *Veillonella*, *Prevotella*, and *Porphyromonas* (Fig.  
306 5A). Gram-negative cell wall structure and the ability to form biofilms are two bacterial  
307 phenotypes often associated with pathogenicity in the human respiratory system (54). BugBase  
308 analysis shows that these bacterial phenotypes do not differ significantly between sinus and  
309 lung samples. Gram-negative bacteria contributing to this phenotype were more varied in lung  
310 samples and included *Veillonella*, *Prevotella*, *Neisseria*, *Stenotrophomonas* species, supporting  
311 the increased richness observed in these samples. Biofilm-forming bacteria were observed in

312 both sinus and lung predicted metagenomes. This phenotype was influenced by the presence of  
313 *Pseudomonas* in both airway sites, but *Burkholderia* and *Achromobacter* both differentiated  
314 sinus from lung samples, while *Neisseria* and *Stenotrophomonas* were more highly represented  
315 for this phenotype in lung samples. Altogether, these data demonstrate that when bacterial  
316 phenotypes are predicted from 16S rRNA sequence data, results point towards the lung  
317 environment being a more anaerobic niche, but that other phenotypes classically linked to  
318 bacterial pathogenicity, such as biofilm formation, are similar between the two sites.

319

## 320 **DISCUSSION**

321 It is poorly understood how bacterial communities of the upper airway contribute to the  
322 etiology of CF-associated CRS. It is also not known how the upper airways contribute to lower  
323 airway infections that represent the primary cause of CF patient morbidity. Numerous studies  
324 have proposed that the paranasal sinuses may be a reservoir for bacteria with pathogenic  
325 potential to adapt to the respiratory system, ultimately contributing to the worsening condition of  
326 the CF patient (23, 24, 28). It was therefore of interest to take an ecological approach towards  
327 exploring bacterial diversity in both the upper and lower airways within CF subjects with CRS, to  
328 better understand the relationship of microbiota throughout the interconnected airways.

329 The CF-CRS patient cohort showed striking inter-individual variability in bacterial  
330 community membership, consistent with prior microbiome studies surveying microbiota in the  
331 upper and lower airways of individuals with CF (32). Despite the considerable variability  
332 between patients, we found that while lung samples harbored an increased diversity in terms of  
333 evenness, FESS-derived sinus samples were less diverse due to the dominance of either  
334 *Staphylococcus* or *Pseudomonas*. Interestingly, this contrasts with a previous study of paired  
335 lung, nasal and throat swab samples in pediatric CF patients, which reported the inverse  
336 relationship between upper and lower airway bacterial communities (32). Given the shared taxa

337 observed between sampling sites in our patient cohort, the data does not rule out the sinuses as  
338 a source of this colonization. Analysis of bacterial diversity in this study continually pointed to  
339 the presence of dominant and highly abundant taxa as being important in delineating these two  
340 respiratory environments. We observed that 100% of sinus communities profiled were  
341 characterized by a single dominant genus, most commonly *Pseudomonas* or *Staphylococcus*.  
342 *Pseudomonas* in particular is a genus associated with declining lung function in CF patients (9).  
343 It was intriguing that several sinus samples had dominant genera that are considered canonical  
344 CF pathogens, yet these bacteria went undetected in the paired lung samples. This is an  
345 important finding in the context of treatment of upper and lower airway infections, as these data  
346 indicate that respiratory cultures from the two sites are not necessarily interchangeable for the  
347 determination of antibiotic therapy.

348         Often in microbiome surveys, individual community members may differ dramatically  
349 from sample to sample, but functional capabilities remain conserved (55). The present study  
350 highlights this relationship in the airways. Contrasting the differences in bacterial diversity  
351 between the sinus and lung niches, we found that the predicted functional capacity of the  
352 bacterial communities in both niches was similar. Yet, interestingly, a small number of BugBase-  
353 inferred phenotypes differed significantly between sample groups. In the context of the bacterial  
354 contribution to CF disease, it is plausible that there are many similarities in the  
355 microenvironments of the upper and lower respiratory system that may contribute, or even result  
356 from these conserved microbial functions. These data support the hypothesis that the sinuses  
357 can harbor bacterial genera, such as *Pseudomonas*, that are well adapted to the respiratory  
358 environment and contribute to lower lung morbidity.

359         Altogether, data presented here demonstrate that despite the unified nature of the  
360 airways, bacterial communities of the sinuses and lungs are distinct. Whereas CF sinuses are  
361 typically dominated by a single organism, the lower airways exhibit greater diversity, marked by  
362 the presence of an anaerobic bacterial phenotype. Despite differences in diversity, bacterial

363 populations share many predicted functional capabilities. Shared taxa between the sample pairs  
364 reflects the interconnectedness of the airway, though differences suggest CF sinus and lung  
365 microenvironments may play a crucial role in dictating the prevalence and abundance of  
366 canonical CF pathogens in the lower airways. Data presented here can be translated to the  
367 clinic by informing caregivers to utilize respiratory cultures originating from samples taken from  
368 the location of infection. Secondly, we advocate for the usefulness of 16S rRNA gene  
369 sequences in the clinical setting to supplement clinical culture data. In the future, it will be  
370 imperative to conduct longitudinal experiments surveying paired upper and lower respiratory  
371 tract samples in CF patients to explore temporal shifts in bacterial diversity as airway infections  
372 evolve.



## 373 ACKNOWLEDGEMENTS

374 We acknowledge the Minnesota Supercomputing Institute (MSI), Daryl Gohl and John Garbe at  
375 the UMN Genomics Center for sequencing assistance. We thank Ali Stockness and Rebecca  
376 Dove of the Department of Otolaryngology, and the members of BioNet at the University of  
377 Minnesota for facilitating sample collection. Our thanks go out to Tonya Ward, Dan Knights, and  
378 the Knights Lab at UMN for their assistance with the BugBase analysis.

379

## 380 REFERENCES

- 381 1. Riordan, Rommens, Kerem, Alon, Rozmahel, Grzelczak, Zielenski, Lok, Plavsic, Chou, et  
382 al. Identification of the cystic fibrosis gene: cloning and characterization of  
383 complementary DNA. *Science* 1989;245:1066–1073.
- 384 2. Davis PB. Cystic fibrosis since 1938. *American journal of respiratory and critical care*  
385 *medicine* 2006;173:475–482.
- 386 3. Gibson R, Burns J, Ramsey B. Pathophysiology and Management of Pulmonary  
387 Infections in Cystic Fibrosis. *American Journal of Respiratory and Critical Care Medicine*  
388 2003;168:918–951.
- 389 4. Lyczak JB, Cannon CL, Pier GB. Establishment of *Pseudomonas aeruginosa* infection:  
390 lessons from a versatile opportunist. *Microbes and Infection* 2000;2:1051–1060.
- 391 5. Sibley CD, Surette MG. The polymicrobial nature of airway infections in cystic fibrosis:  
392 Cangene Gold Medal. *Canadian Journal of Microbiology* 2011;57:69–77.
- 393 6. Rogers GB, Skelton S, Serisier DJ. Determining cystic fibrosis-affected lung  
394 microbiology: comparison of spontaneous and serially induced sputum samples by use of  
395 terminal restriction fragment length polymorphis profiling. *Journal of clinical microbiology*  
396 2010;78-86
- 397 7. Tunney M, Field T, Moriarty T, Patrick S, Doering G, Muhlebach M, Wolfgang M, Boucher  
398 R, Gilpin D, McDowell A, Elborn S. Detection of Anaerobic Bacteria in High Numbers in  
399 Sputum from Patients with Cystic Fibrosis. *American Journal of Respiratory and Critical*  
400 *Care Medicine* 2008;177:995–1001.
- 401 8. Filkins L, O'Toole G. Cystic Fibrosis Lung Infections: Polymicrobial, Complex, and Hard  
402 to Treat. *Plos Pathog* 2015;11:e1005258.

- 403 9. Coburn B, Wang P, Caballero J, Clark S, Brahma V, Donaldson S, Zhang Y, Surendra A,  
404 Gong Y, Tullis E, Yau Y, Waters V, Hwang D, Guttman D. Lung microbiota across age  
405 and disease stage in cystic fibrosis. *Sci Reports* 2015;5:10241.
- 406 10. Chaaban M, Kejner A, Rowe S, Woodworth B. Cystic fibrosis chronic rhinosinusitis: A  
407 comprehensive review. *Amj Rhinol Allergy* 2013;27:387–395(9).
- 408 11. Orlandi R, Kingdom T, Hwang P, Smith T, Alt J, Baroody F, Batra P, Bernal-Sprekelsen  
409 M, Bhattacharyya N, Chandra R, Chiu A, Citardi M, Cohen N, DelGaudio J, Desrosiers M,  
410 Dhong H, Douglas R, Ferguson B, Fokkens W, Georgalas C, Goldberg A, Gosepath J,  
411 Hamilos D, Han J, Harvey R, Hellings P, Hopkins C, Jankowski R, Javer A, *et al.*  
412 International Consensus Statement on Allergy and Rhinology: Rhinosinusitis. *Int Forum*  
413 *Allergy Rhinology* 2016;6:S22–S209.
- 414 12. Benninger MS, Ferguson BJ, Hadley JA, Hamilos DL, Jacobs M, Kennedy DW, Lanza  
415 DC, Marple BF, Osguthorpe JD, Stankiewicz JA, Anon J, Denny J, Emanuel I, Levine  
416 H. Adult chronic rhinosinusitis: definitions, diagnosis, epidemiology, and pathophysiology.  
417 *Otolaryngol Head Neck Surg* 2003;129:S1–32.
- 418 13. Gentile V, Isaacson G. Patterns of Sinusitis in Cystic Fibrosis. *Laryngoscope*  
419 1996;106:1005–1009.
- 420 14. Ledesma-Medina, Osman, Girdany. Abnormal paranasal sinuses in patients with cystic  
421 fibrosis of the pancreas. Radiological findings. *Pediatr Radiol* 1980;9:61–4.
- 422 15. Robertson JM, Friedman EM, Rubin BK. Nasal and sinus disease in cystic fibrosis.  
423 *Paediatr Respir Rev* 2008;9:213–9.
- 424 16. Roby BB, McNamara J, Finkelstein M. Sinus surgery in cystic fibrosis patients:  
425 comparison of sinus and lower airway cultures. *International journal of pediatric*  
426 *otorhinolaryngology* 2008; 72(9):1365-1369.
- 427 17. Klepac-Ceraj, Lemon, Martin. Relationship between cystic fibrosis respiratory tract  
428 bacterial communities and age, genotype, antibiotics and *Pseudomonas aeruginosa*.  
429 *Environmental microbiology* 2010; 12(5) 1293-1303.
- 430 18. Wilson M. Microbial inhabitants of humans: their ecology and role in health and disease.  
431 Cambridge University Press, 2005.
- 432 19. Bonestroo H, de Groot WK. Upper and lower airway cultures in children with cystic  
433 fibrosis: do not neglect the upper airways. *Journal of Cystic Fibrosis* 2010; 9(2):130-134.
- 434 20. Berkhout MC, Rijntjes E, El Bouazzaoui LH, Fokkens WJ, Brimicombe RW, Heijerman

- 435 HG. Importance of bacteriology in upper airways of patients with Cystic Fibrosis. *J Cyst*  
436 *Fibros* 2013;12:525–9.
- 437 21. Dosanjh A, Lakhani S, Elashoff D, Chin C, Hsu V, Hilman B. A comparison of  
438 microbiologic flora of the sinuses and airway among cystic fibrosis patients with maxillary  
439 antrostomies. *Pediatr Transplant* 2000;4:182–5.
- 440 22. Taylor RF, Morgan DW, Nicholson PS, Mackay IS. Extrapulmonary sites of  
441 *Pseudomonas aeruginosa* in adults with cystic fibrosis. *Thorax* 1992;47(6):426-428.
- 442 23. Mainz, Naehrlich, Schien, Käding, Schiller, Mayr, Schneider, Wiedemann, Wiehlmann,  
443 Cramer, Pfister, Kahl, Beck, Tümmler. Concordant genotype of upper and lower airways  
444 *P aeruginosa* and *S aureus* isolates in cystic fibrosis. *Thorax* 2009;64:535–540.
- 445 24. Whiteson K, Bailey B, Bergkessel M, Conrad D, Delhaes L, Felts B, Harris K, Hunter R,  
446 Lim Y, Maughan H, Quinn R, Salamon P, Sullivan J, Wagner B, Rainey P. The upper  
447 respiratory tract as a microbial source for pulmonary infections in cystic fibrosis. Parallels  
448 from island biogeography. *American journal of respiratory and critical care medicine*  
449 2014;189:1309–15.
- 450 25. Dickson R, Erb-Downward J, Huffnagle G. Towards an ecology of the lung: new  
451 conceptual models of pulmonary microbiology and pneumonia pathogenesis. *The Lancet*  
452 *Respiratory Medicine* 2014;2:238–246.
- 453 26. Johansen H, Aanaes K, Pressler T, Nielsen K, Fisker J, Skov M, Iby N, Buchwald C.  
454 Colonisation and infection of the paranasal sinuses in cystic fibrosis patients is  
455 accompanied by a reduced PMN response. *Journal of cystic fibrosis : official journal of*  
456 *the European Cystic Fibrosis Society* 11:525–31.
- 457 27. Godoy JM, Godoy AN, Ribalta G, Largo I. Bacterial pattern in chronic sinusitis and cystic  
458 fibrosis. *Otolaryngol Head Neck Surg* 2011;145:673–6.
- 459 28. Ciofu O, Johansen H, Aanaes K, Wassermann T, Alhede M, Buchwald C, Iby N. *P.*  
460 *aeruginosa* in the paranasal sinuses and transplanted lungs have similar adaptive  
461 mutations as isolates from chronically infected CF lungs. *Journal of cystic fibrosis : official*  
462 *journal of the European Cystic Fibrosis Society* 12:729–36.
- 463 29. Syed, SA, Whelan, FJ, Waddell, B, Rabin, HR, Parkins, MD, Surette, MG. Reemergence  
464 of Lower-Airway Microbiota in Lung Transplant Patients with Cystic Fibrosis. *Annals of*  
465 *the American Thoracic Society* 2016;13(12):2132-2142.
- 466 30. Rudkjøbing V, Aanaes K, Wolff T, Buchwald C, Johansen H, Thomsen T. An exploratory  
467 study of microbial diversity in sinus infections of cystic fibrosis patients by molecular

- 468 methods. *Journal of Cystic Fibrosis* 2014;13:645–652.
- 469 31. Digoy GP, Dunn JD, Stoner JA, Christie A, Jones DT. Bacteriology of the paranasal  
470 sinuses in pediatric cystic fibrosis patients. *Int J Pediatr Otorhinolaryngol* 2012;76:934–8.
- 471 32. Boutin S, Graeber SY, Weitnauer M, Panitz J, Stahl M, Clausznitzer D, Kaderali L,  
472 Einarsson G, Tunney MM, Elborn JS, Mall MA, Dalpke AH. Comparison of microbiomes  
473 from different niches of upper and lower airways in children and adolescents with cystic  
474 fibrosis. *PLoS ONE* 2015;10:e0116029.
- 475 33. Lavin J, Bhushan B, Schroeder JW. Correlation between respiratory cultures and sinus  
476 cultures in children with cystic fibrosis. *International journal of pediatric*  
477 *otorhinolaryngology* 2013; 77(5): 686-689.
- 478 34. Osborn AJ, Leung R, Ratjen F. Effect of endoscopic sinus surgery on pulmonary  
479 function and microbial pathogens in a pediatric population with cystic fibrosis. ... *Head &*  
480 *Neck* ... 2011;doi:10.1001/archoto.2011.68.
- 481 35. Rihani JJ, McClay JE. Impact of endoscopic sinus surgery on pulmonary function in  
482 children with cystic fibrosis. *Otolaryngology--Head and Neck Surgery* 2011;at  
483 <[http://oto.sagepub.com/content/145/2\\_suppl/P108.2.short](http://oto.sagepub.com/content/145/2_suppl/P108.2.short)>.
- 484 36. Lane DJ. 16S/23S rRNA sequencing. *Nucleic acid techniques in bacterial systematics*  
485 1991;at <<http://ci.nii.ac.jp/naid/10008470323/>>.
- 486 37. Muyzer G, Waal DE. Profiling of complex microbial populations by denaturing gradient  
487 gel electrophoresis analysis of polymerase chain reaction-amplified genes coding for 16S  
488 rRNA. *Applied and* ... 1993;at <<http://aem.asm.org/content/59/3/695.short>>.
- 489 38. Abreu N, Nagalingam N, Song Y, Roediger F, Pletcher S, Goldberg A, Lynch S. Sinus  
490 Microbiome Diversity Depletion and *Corynebacterium tuberculostearicum* Enrichment  
491 Mediates Rhinosinusitis. *Sci Transl Medicine* 2012;4:151ra124–151ra124.
- 492 39. Gohl D, Vangay P, Garbe J, MacLean A, Hauge A, Becker A, Gould T, Clayton J,  
493 Johnson T, Hunter R, Knights D, Beckman K. Systematic improvement of amplicon  
494 marker gene methods for increased accuracy in microbiome studies. *Nat Biotechnol*  
495 2016;doi:10.1038/nbt.3601.
- 496 40. Garbe JR, Gould T, Knights D, Beckman K. Gopher-Pipelines: Metagenomics-Pipeline  
497 Version 1.4 [Computer software]. 2016;
- 498 41. Langille MG, Zaneveld J, Caporaso JG, McDonald D, Knights D, Reyes JA, Clemente JC,  
499 Burkepille DE, Vega Thurber RL, Knight R, Beiko RG, Huttenhower C. Predictive

- 500 functional profiling of microbial communities using 16S rRNA marker gene sequences.  
501 *Nat Biotechnol* 2013;31:814–21.
- 502 42. Markowitz VM, Chen I, Palaniappan K. IMG 4 version of the integrated microbial  
503 genomes comparative analysis system. *Nucleic acids* ... 2013;doi:10.1093/nar/gkt963.
- 504 43. Mao C, Nordberg EK, Olson R, Overbeek R. PATRIC, the bacterial bioinformatics  
505 database and analysis resource. *Nucleic acids* ... 2013;doi:10.1093/nar/gkt1099.
- 506 44. Kanehisa M, Sato Y, Kawashima M, Furumichi M, Tanabe M. KEGG as a reference  
507 resource for gene and protein annotation. *Nucleic acids research*  
508 2015;gkv1070.doi:10.1093/nar/gkv1070.
- 509 45. Caporaso GJ, Kuczynski J, Stombaugh J, Bittinger K, Bushman FD, Costello EK, Fierer  
510 N, Pena A, Goodrich JK, Gordon JI. QIIME allows analysis of high-throughput community  
511 sequencing data. *Nature methods* 2010;7:335–336.
- 512 46. Oksanen J, Blanchet FG, Kindt R. Package “vegan.” *Community ecology* ... 2013;at  
513 <<http://mirror.bjtu.edu.cn/cran/web/packages/vegan/vegan.pdf>>.
- 514 47. Kennedy JL, Hubbard MA, Huyett P, Patrie JT. Sino-nasal outcome test (SNOT-22): a  
515 predictor of postsurgical improvement in patients with chronic sinusitis. *Annals of Allergy*  
516 2013;at <<http://www.sciencedirect.com/science/article/pii/S1081120613004791>>.
- 517 48. Miller MR, Hankinson J, Brusasco V, Burgos F, Casaburi R, Coates A, Crapo R, Enright  
518 P, van der Grinten CP, Gustafsson P, Jensen R, Johnson DC, MacIntyre N, McKay R,  
519 Navajas D, Pedersen OF, Pellegrino R, Viegi G, Wanger J. Standardisation of spirometry.  
520 *Eur Respir J* 2005;26:319–38.
- 521 49. Zhao, Schloss, Kalikin. Decade-long bacterial community dynamics in cystic fibrosis  
522 airways. 2012;doi:10.1073/pnas.1120577109.
- 523 50. Li K, Bihan M, Yooseph S, Meth'e M. Analyses of the microbial diversity across the  
524 human microbiome. *PLoS ONE* 7:
- 525 51. Hill. Diversity and Evenness: A Unifying Notation and Its Consequences. *Ecology*  
526 1973;54:427–432.
- 527 52. Charlson ES, Bittinger K, Haas AR, Fitzgerald AS, Frank I, Yadav A, Bushman FD,  
528 Collman RG. Topographical Continuity of Bacterial Populations in the Healthy Human  
529 Respiratory Tract. 2011;184:957–963.
- 530 53. Lozupone C, Knight R. UniFrac: a New Phylogenetic Method for Comparing Microbial  
531 Communities UniFrac: a New Phylogenetic Method for Comparing Microbial

- 532           Communities. *Applied and environmental microbiology* 71:8228–8235.
- 533   54.   Costerton JW. Cystic fibrosis pathogenesis and the role of biofilms in persistent infection.  
534           *Trends Microbiol* 2001;9:50–52.
- 535   55.   Huttenhower C, Gevers D, Knight R, Abubucker S, Badger J, Chinwalla A, Creasy H, Earl  
536           A, FitzGerald M, Fulton R, Giglio M, Hallsworth-Pepin K, Lobos E, Madupu R, Magrini V,  
537           Martin J, Mitreva M, Muzny D, Sodergren E, Versalovic J, Wollam A, Worley K, Wortman  
538           J, Young S, Zeng Q, Aagaard K, Abolude O, Allen-Vercoe E, Alm E, *et al.* Structure,  
539           function and diversity of the healthy human microbiome. *Nature* 486:207–214.
- 540

541 **TABLES**

542 **Table 1 – Summary of subject clinical data**

| Patient         | Sex | Age      | CFTR Genotype            | FEV1%    | SNOT-22 | Prior<br>FESS (#) | Polyposis | PA  | SA  |
|-----------------|-----|----------|--------------------------|----------|---------|-------------------|-----------|-----|-----|
| <b>1</b>        | M   | 25       | ΔF508/R553X              | 66       | 21      |                   | Yes       |     |     |
| <b>2</b>        | M   | 31       | ΔF508/ΔF508              | 49       | 41      | Yes(2)            | Yes       | Yes |     |
| <b>3</b>        | M   | 28       | ΔF508/ΔF508              | 74       | 21      |                   | Yes       | Yes |     |
| <b>4</b>        | M   | 42       | ΔF508/ΔF508              |          |         | Yes(4)            | Yes       | Yes | Yes |
| <b>5</b>        | M   | 31       | ΔF508/ΔF508              | 95       | 20      | Yes(2)            | Yes       |     |     |
| <b>6</b>        | M   | 26       | G551D/2789+5G>A          | 105      | 8       |                   | Yes       |     | Yes |
| <b>7</b>        | F   | 19       | Unknown/Unknown          | 37       | 50      | Yes(4)            |           |     |     |
| <b>8</b>        | F   | 26       | ΔF508/1717-1G>A          | 98       | 59      | Yes(1)            | Yes       | Yes | Yes |
| <b>9</b>        | F   | 32       | ΔF508/ΔF508              | 31       | 34      | Yes(1)            | Yes       | Yes |     |
| <b>10</b>       | M   | 41       | 1717-1G-7A/3849+10kbc-T1 | 72       | 23      | Yes(1)            | Yes       |     |     |
| <b>11</b>       | F   | 36       | ΔF508/ΔF508              | 61       | 36      | Yes(1)            |           | Yes | Yes |
| <b>12</b>       | M   | 31       | ΔF508/394deITT           | 57       | 58      | Yes(3)            | Yes       | Yes | Yes |
| <i>Avg. +/-</i> |     | 30.5 +/- |                          | 67.7 +/- | 35 +/-  |                   |           |     |     |
| <i>s.d.</i>     |     | 6.5      |                          | 24.3     | 17.2    |                   |           |     |     |

543

544

545 **FIGURES**

546

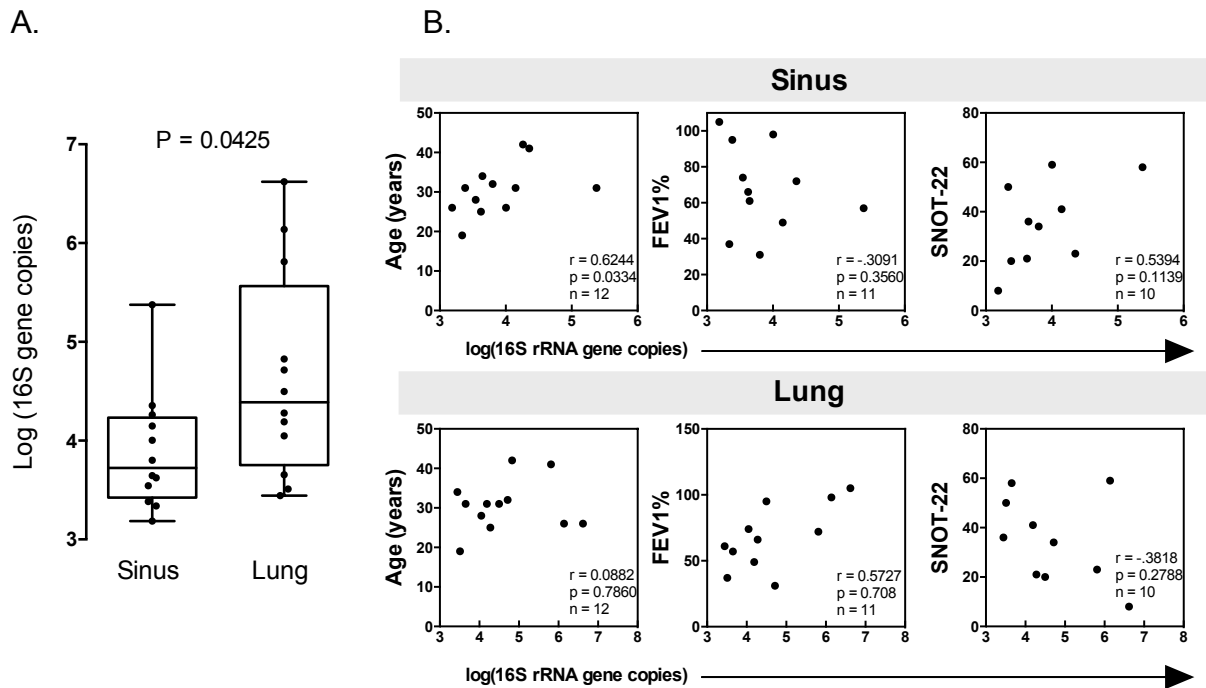

547

548 **Figure 1. 16S gene copies are greater in CF lung sputum compared to sinus samples,**

549 **and correlate with patient age.** Quantitative PCR was used to enumerate 16S rRNA gene

550 copies per 10 ng of genomic DNA isolated from sinus and lung samples. **A.** Comparison of 16S

551 rRNA gene copies in sinus and lung sample pairs by qPCR. (Wilcoxon signed-rank test

552  $P=0.0425$ ). **B.** Spearman correlations with 16S rRNA gene copies and patient clinical data. In

553 sinus samples, 16S copies are positively and significantly correlated with patient age.



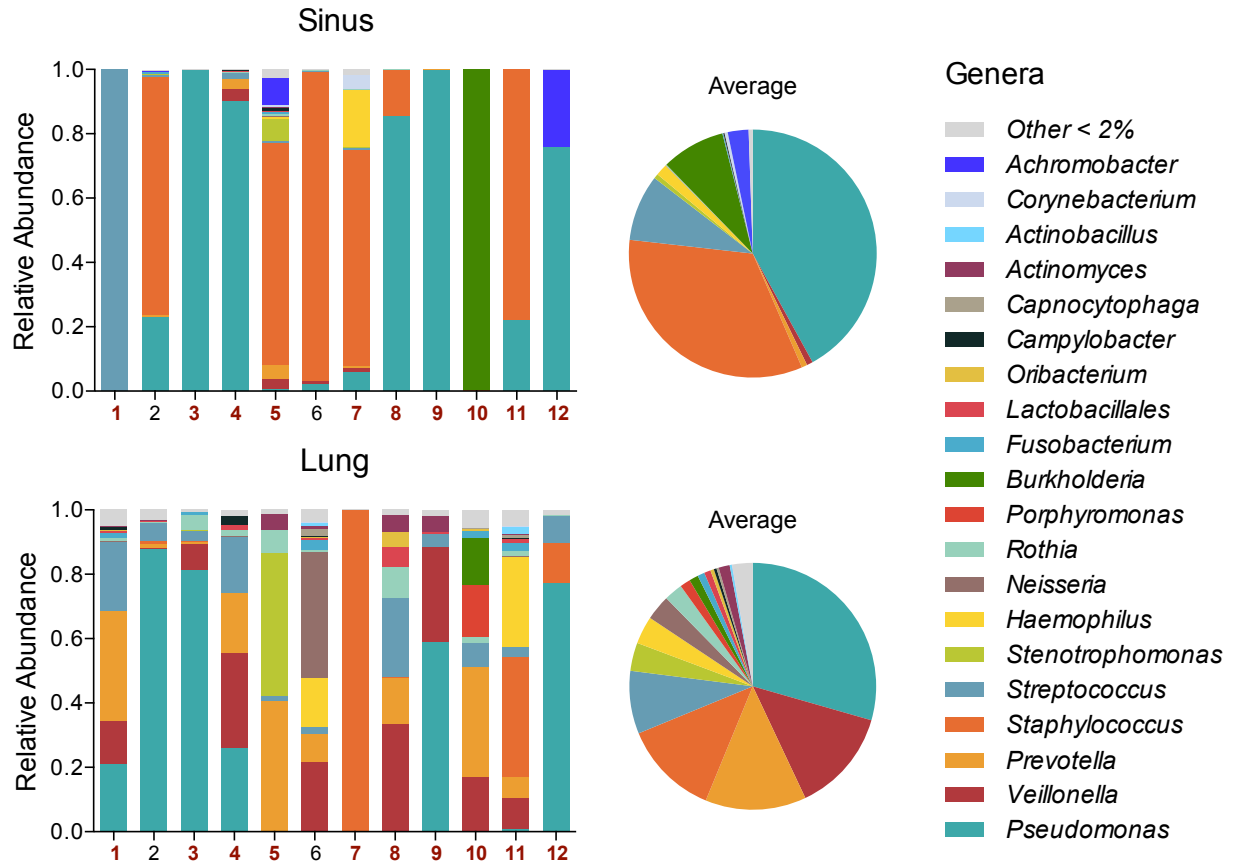

554

555 **Figure 2. Bacterial community composition of the upper and lower airways.** Stacked bar  
 556 plots of relative abundances of genera in paired sinus and lung samples demonstrate  
 557 dominance of *Pseudomonas*, *Staphylococcus*, and *Streptococcus* genera. Red patient numbers  
 558 indicate samples where bacterial membership was significantly correlated within pairs. Data for  
 559 these relationships is presented in Table E1. Pie charts show the average abundance of genera  
 560 for each sample type across the patient cohort.

561

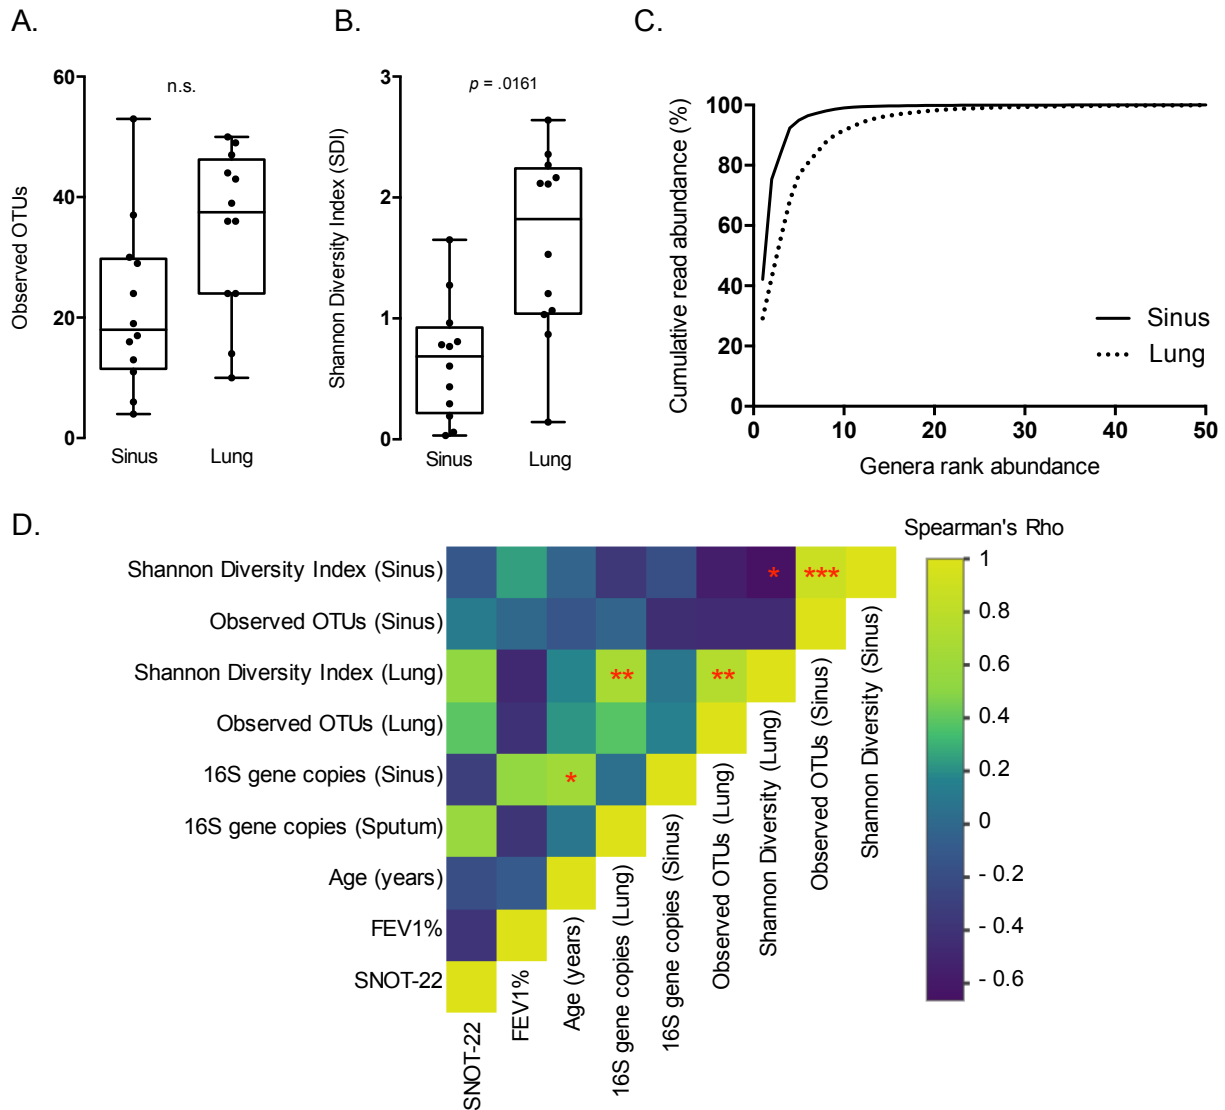

562

563 **Figure 3. Alpha diversity of CF sinuses differs from CF lung sputum.** **A.** Observed OTUs  
 564 are modestly greater in lung samples compared to the sinuses. Lung samples display  
 565 significantly greater evenness in OTU distribution relative to sinus samples (Wilcoxon signed  
 566 rank test,  $P = 0.0161$ ). **B.** Rank abundance curves reveal that both sinus and lung bacterial  
 567 communities are dominated by a few organisms. 10 and 20 genera represent 99% of the  
 568 sequences for sinus and lung samples, respectively. **C.** Spearman correlation heat map shows  
 569 association of bacterial diversity (Observed OTUs, Shannon), bacterial 16S gene abundance,  
 570 and clinical factors. (\*  $P \leq 0.05$ , \*\*  $P \leq 0.01$ , \*\*\*  $P \leq 0.001$ ).

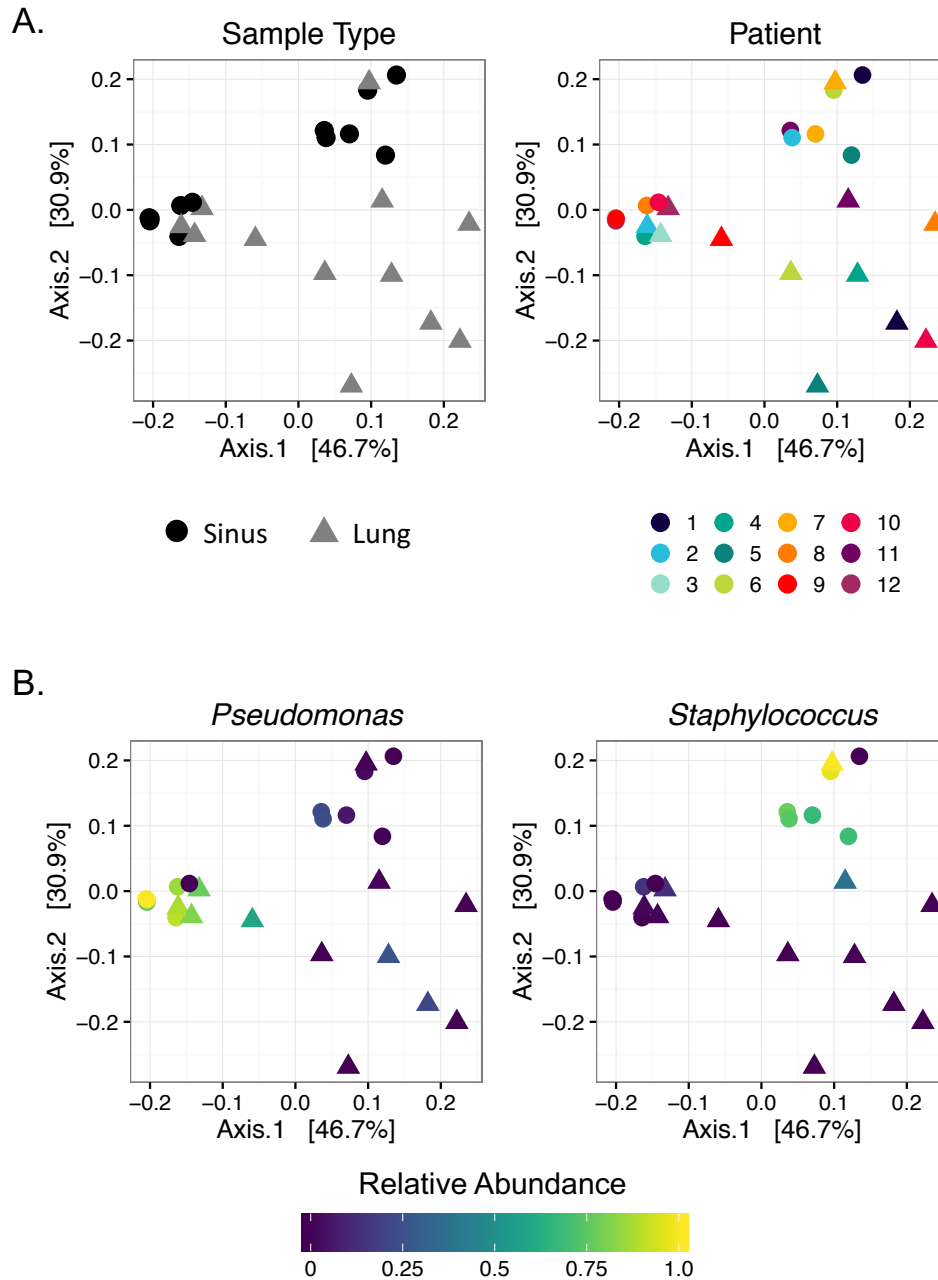

571

572 **Figure 4. Ordination of weighted Unifrac distances shows clustering by sample type and**  
573 **dominant organism. A.** Samples show more similarity by sample type rather than sampled  
574 individual ( $P=0.019$ ). Color and shape denote patient and sample type, respectively. Sinus and  
575 lung samples do not cluster by patient, but do show clustering by sample type. **B.** PCoA colored  
576 by relative abundance of dominant organisms (defined in text), shows sinus sample grouping is  
577 highly dependent on relative abundance of *Pseudomonas* and *Staphylococcus*.

578

**A. Phenotype: anaerobic metabolism**

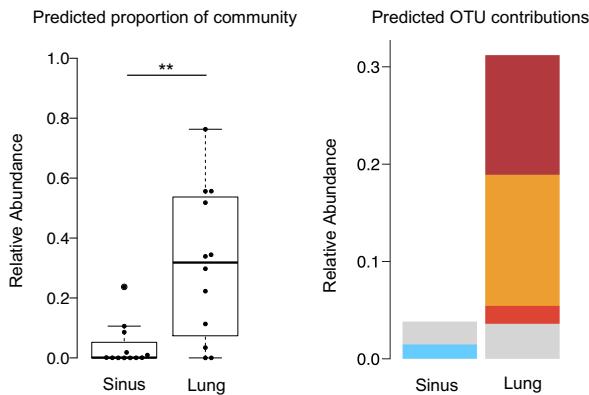

**B. Phenotype: biofilm formation**

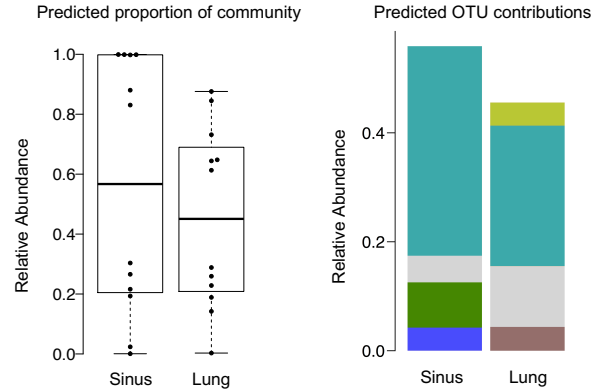

**C. Phenotype: Gram negative**

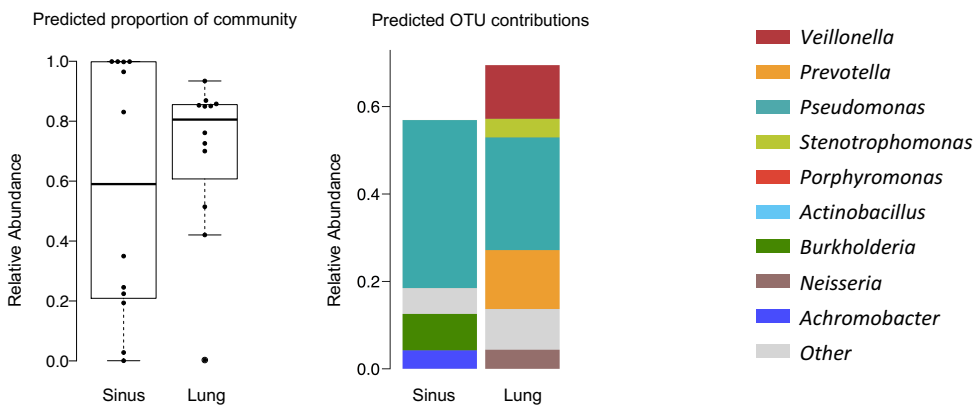

579

580 **Figure 5. BugBase analysis of PICRUSt predicted metagenomes. A.** Anaerobic metabolism  
 581 phenotype is significantly enriched in lung samples (Wilcoxon signed-rank test,  $P=0.01$ ). **B.**  
 582 Biofilm formation does not differ significantly with sample type (Wilcoxon signed-rank test,  
 583  $P=0.57$ ). **C.** Gram-negative phenotype is driven by presence of *Veillonella* *Prevotella* and  
 584 *Pseudomonas* in lung samples (Wilcoxon signed-rank test,  $P=0.47$ ). (\*  $P \leq 0.05$ , \*\*  $P \leq 0.01$ , \*\*\*  
 585  $P \leq 0.001$ )
